# Supplementary material
Source: PubMed Central journal article supplement (PMC4280638)
Supplement: pnas.201415856SI.pdf [file pnas.201415856SI.pdf]

# Supporting Information

Wan et al. 10.1073/pnas.1415856111

## SI Materials and Methods

**Proposals for Keto-Enol Tautomerization of Substrate and the DHFR Catalytic Mechanism.** As noted in the main text, competing versions of this mechanism have been proposed previously (1–3). In one version, the Asp27 is ionized in the ground state. However, on substrate binding, water is released from the active site, lowering the local dielectric constant and raising the  $pK_a$  of Asp27, allowing its carboxylate to become protonated by the substrate N3 (1). This initiates tautomerization of DHF at the pterin N3-C4-O4 atoms, ultimately converting the O4 to a hydroxyl (enol). The enol at pterin O4 is the proton donor to N5. The Asp27 protonates N3, returning Asp27 to a carboxylate species and allowing the substrate to tautomerize to the keto form.

A related proposal is that Asp27 is protonated in the ground state and triggers a proton relay with the pterin O4 via a crystallographically observed water molecule (2), resulting in an enol at C4-O4 as described above. The enol tautomer is stabilized by the Gandour effect (4), and the O4 transfers its proton to a water molecule that has gained access to the active site due to Met20 loop fluctuations. This water, not the O4 enol, is the ultimate proton donor to N5 (3).

**HDX Characteristics of the  $\alpha$ A Helix.** The  $\alpha$ A helix, which undergoes complete HDX, is associated with substrate binding. Substrate binding expels water molecules from the active site and causes the  $\alpha$ A helix to become more accessible, resulting in the main chain amides of the  $\alpha$ A helix forming hydrogen bonds to 14 water molecules.

**Purification, Crystallization, and Data Collection.** ecDHFR was expressed, purified, and crystallized as described previously (5, 6). Folate and NADP<sup>+</sup> were added to the purified DHFR solution at a molar ratio of 3:3:1 and concentrated to 40 mg/mL. The ecDHFR-folate-NADP<sup>+</sup> complex was initially crystallized under the following conditions: 18% PEG 400, 100 mM MnCl<sub>2</sub>, and 20 mM imidazole (pH 7.0). A single 3.6-mm<sup>3</sup> (4 × 1.3 × 0.7 mm) crystal was obtained by the microseeding technique, followed by the macroseeding technique. The 2.0-Å resolution neutron diffraction data were collected at 291 K using IMAGINE at Oak Ridge National Laboratory. The 1.6-Å resolution X-ray diffraction data were collected at 291 K with a smaller crystal using a Rigaku MicroMax-007HF X-ray generator, Osmic VariMax optics, and an R-Axis IV++ image plate. Collection of the 291 K neutron and X-ray data sets has been described previously (6). The diffraction data were processed and scaled with the HKL3000 program (7).

For the 100 K and 277 K datasets, crystals were grown from recombinant protein overexpressed in the *E. coli* strain BL21 (DE3) (Novagen) using a pET22b construct (8). Cells were grown in LB medium with 100 µg/mL ampicillin and shaking at 37 °C until they reached an OD<sub>600</sub> of 0.7, at which point they were induced with 0.4 mM IPTG. Induced cells were incubated at room temperature overnight and then harvested by centrifugation, frozen in liquid nitrogen, and stored at –80 °C.

Cell pellets were lysed on ice in 25 mM Hepes (pH 7.5), 1 mM EDTA, and 1 mM DTT (stabilization buffer) with 1 mg/mL lysozyme and brief sonication. The lysate was centrifuged at 10,000 × *g*, and streptomycin sulfate was used to precipitate nucleic acids. The sample was again centrifuged at 10,000 × *g* for 30 min, after which the supernatant was dialyzed overnight against stabilization buffer at 4 °C. DHFR was affinity-purified from the dialyzed clarified lysate using an MTX-agarose DHFR affinity resin (Sigma-Aldrich). Resin-bound DHFR was eluted with 200 mM sodium borate

(pH 9.0), 3 mM folic acid, 0.5 M NaCl, 1 mM EDTA, and 1 mM DTT (elution buffer). Any endogenous copurifying nucleotide cofactors in the highly pure DHFR fraction were removed using a DEAE-sephacel anion-exchange column with a linear elution gradient from 0 to 0.5 M KCl in 10 mM Tris-HCl, 1 mM EDTA, and 1 mM DTT. DHFR-containing fractions were pooled, and their concentrations were determined using absorbance at 280 nm ( $\epsilon_{280} = 33,690 \text{ M}^{-1} \text{ cm}^{-1}$ ) and bound to folic acid by dialysis against 20 mM imidazole (pH 7.0) (crystallization buffer) with 1 mM folic acid at 4 °C. DHFR-folate was concentrated to 35 mg/mL and stored at 4 °C.

Freshly made NADP<sup>+</sup> was added to aliquots of the concentrated DHFR-folate complex to a final concentration of 6 mM. Crystals were grown at 4 °C using the hanging drop vapor diffusion method against a reservoir solution containing 17% PEG 400, 20 mM imidazole pH 7.0, and 125 mM MnCl<sub>2</sub>. Crystals grew to their maximum dimensions after 1–2 wk. For the sample used to collect the 100 K X-ray dataset, one crystal was cryoprotected by transfer through increasing concentrations of PEG 400 to a final concentration of 30% in 20 mM imidazole (pH 7.0) and 125 mM MnCl<sub>2</sub>. For the 277 K dataset, several crystals were placed into reservoir solution [17% PEG 400, 20 mM imidazole (pH 7.0), and 125 mM MnCl<sub>2</sub>] and mounted into quartz capillary tubes (Hampton Research).

**Structure Determination and Refinement.** The joint X-ray neutron (XN) structure of ecDHFR-folate-NADP<sup>+</sup> ternary complex was refined against the 2.0-Å neutron and 1.6-Å X-ray diffraction data using the Phenix program suite (9) and manipulated manually using Coot (10). After removing all of the ligands and water from the initial model [PDB ID code 1RX2 (11)], the structure was solved using the molecule replacement program Phaser (12), incorporated in Phenix, and refined against the X-ray data. After two rounds of refinement and model manipulation, folate and NADP<sup>+</sup> were built in according to the clear electron density in the 2Fo – Fc and Fo – Fc omit maps. Hydrogen atoms and exchangeable deuterium atoms were added into the model and the model was refined against the X-ray and neutron diffraction data afterward. D<sub>2</sub>O water molecules were finally added according to both the nuclear and electron density maps. The final *R* and *R*<sub>free</sub> values of the refined model were 0.2310 and 0.2714, respectively (Table S1).

The atom depth, calculated as the distance between each atom to the closest solvent accessible neighboring atom, was carried out using the DPX server (13). The topology diagram depicting the hydrogen/deuterium exchange rate was generated using the TopDro program (14) incorporated in the CCP4 program suite (15). The solvent accessible surface area was calculated using the Areaimol program (16) incorporated in the CCP4 program suite.

The 100 K and 277 K X-ray datasets were collected at beamline 11-1 at the Stanford Synchrotron Radiation Laboratory. For the 100 K dataset, the data were obtained from a single crystal using 13.776-KeV incident X-rays. Two orientations of this crystal were used to measure reflections that would otherwise have been lost in the blind region. Both high-resolution (2.0–0.85 Å) and low-resolution (75–1.5 Å) datasets were collected for both the 100 K and 277 K samples. For the 277 K dataset, three capillary-mounted crystals at 277 K were used to collect data in multiple wedges to minimize radiation damage. All diffraction data were indexed, integrated, and scaled in HKL2000, with data statistics provided in Table 1.

The models for the 100 K and 277 K X-ray data for the DHFR-folate-NADP<sup>+</sup> ternary complexes were refined with SHELX-97 (17) using 1RX2 as the initial model. Initial rigid body refinement was followed by stereochemically restrained refinement of coordinates and individual atomic isotropic displacement parameters against an intensity-based target. Restraints were used for all protein and cofactor atoms at each stage of the refinement. Individual anisotropic atomic displacement parameters were refined for all atoms. Subsequent cycles of refinement included the modeling of residues in alternate conformations and modeling of an ambiguously oxidized cysteine at residue 152 as a cysteine sulfenic acid in dual conformations. Riding hydrogen atoms were

added to all atoms except histidine Nε1 and Nδ2 atoms, tyrosine O atoms, threonine Oγ2 atoms, and serine Oγ atoms, owing to the hydrogen positional ambiguity for these atoms.

In the 1.05-Å resolution 277 K model, the occupancy of the partially occupied water molecule near the N5 atom of folate and the two conformations of the Met20 residue were all fixed to 0.5. This approach is consistent with correlated disorder of the Met20 side chain and the water molecule, which is reasonable given the close contact distance (1.7 Å) between the water and Cε atom of the conflicting conformation of Met20. In the final 10 cycles of refinement, the test set and the working set of reflections were combined for both the 100 K and 277 K datasets.

- Cummins PL, Gready JE (2001) Energetically most likely substrate and active-site protonation sites and pathways in the catalytic mechanism of dihydrofolate reductase. *J Am Chem Soc* 123(15):3418–3428.
- Byströff C, Oatley SJ, Kraut J (1990) Crystal structures of *Escherichia coli* dihydrofolate reductase: The NADP<sup>+</sup> holoenzyme and the folate/NADP<sup>+</sup> ternary complex. Substrate binding and a model for the transition state. *Biochemistry* 29(13):3263–3277.
- Reyes VM, Sawaya MR, Brown KA, Kraut J (1995) Isomorphous crystal structures of *Escherichia coli* dihydrofolate reductase complexed with folate, 5-deazafofolate, and 5,10-dideazatetrahydrofolate: Mechanistic implications. *Biochemistry* 34(8):2710–2723.
- Gandour RD (1981) On the importance of orientation in general base catalysis by carboxylate. *Bioorg Chem* 10:169–176.
- Bennett BC, Xu H, Simmerman RF, Lee RE, Dealwis CG (2007) Crystal structure of the anthrax drug target, *Bacillus anthracis* dihydrofolate reductase. *J Med Chem* 50(18):4374–4381.
- Wan Q, et al. (2014) Preliminary joint X-ray and neutron protein crystallographic studies of ecDHFR complexed with folate and NADP<sup>+</sup>. *Acta Crystallogr F Struct Biol Commun* 70(Pt 6):814–818.
- Minor W, Cymborowski M, Otwinowski Z, Chruszcz M (2006) HKL-3000: The integration of data reduction and structure solution—from diffraction images to an initial model in minutes. *Acta Crystallogr D Biol Crystallogr* 62(Pt 8):859–866.
- Cameron CE, Benkovic SJ (1997) Evidence for a functional role of the dynamics of glycine-121 of *Escherichia coli* dihydrofolate reductase obtained from kinetic analysis of a site-directed mutant. *Biochemistry* 36(50):15792–15800.
- Adams PD, et al. (2010) PHENIX: A comprehensive Python-based system for macromolecular structure solution. *Acta Crystallogr D Biol Crystallogr* 66(Pt 2):213–221.
- Emsley P, Cowtan K (2004) Coot: Model-building tools for molecular graphics. *Acta Crystallogr D Biol Crystallogr* 60(Pt 12 Pt 1):2126–2132.
- Sawaya MR, Kraut J (1997) Loop and subdomain movements in the mechanism of *Escherichia coli* dihydrofolate reductase: Crystallographic evidence. *Biochemistry* 36(3):586–603.
- McCoy AJ, et al. (2007) Phaser crystallographic software. *J Appl Cryst* 40(Pt 4):658–674.
- Pintar A, Carugo O, Pongor S (2003) DPX: For the analysis of the protein core. *Bioinformatics* 19(2):313–314.
- Bond CS (2003) TopDraw: A sketchpad for protein structure topology cartoons. *Bioinformatics* 19(2):311–312.
- Collaborative Computational Project, Number 4 (1994) The CCP4 suite: Programs for protein crystallography. *Acta Crystallogr D Biol Crystallogr* 50(Pt 5):760–763.
- Lee B, Richards FM (1971) The interpretation of protein structures: Estimation of static accessibility. *J Mol Biol* 55(3):379–400.
- Sheldrick GM, Schneider TR (1997) SHELXL: High-resolution refinement. *Methods Enzymol* 277:319–343.

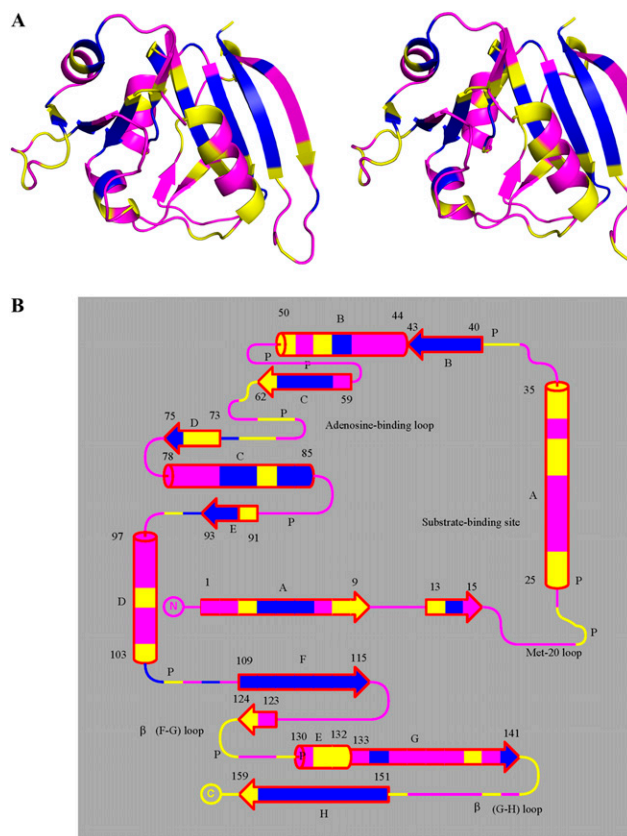

**Fig. S1.** HDX analysis of ecDHFR-folate-NADP<sup>+</sup>. (A) Stereoview cartoon diagram of residues colored based on the occupancy of backbone amide HDX. (B) Topology diagram of backbone amide HDX pattern for the ternary complex. Nonexchanged (0–0.15) amides are represented in blue; partially exchanged (0.16–0.69) amides, in yellow; completely exchanged (0.7–1.0) amides, in magenta.



**Table S1. Data collection and structure refinement statistics**

| Variable                                                       | Neutron 291 K                                 | X-ray 291 K                                   | X-ray 100 K                                   | X-ray 277 K                                   |
|----------------------------------------------------------------|-----------------------------------------------|-----------------------------------------------|-----------------------------------------------|-----------------------------------------------|
| <b>Data collection</b>                                         |                                               |                                               |                                               |                                               |
| Ligands                                                        | Folate NADP <sup>+</sup>                      | Folate NADP <sup>+</sup>                      | Folate NADP <sup>+</sup>                      | Folate NADP <sup>+</sup>                      |
| Space group                                                    | P2 <sub>1</sub> 2 <sub>1</sub> 2 <sub>1</sub> |
| Cell dimensions                                                |                                               |                                               |                                               |                                               |
| a, b, c, Å                                                     | 34.3, 45.7, 98.9                              | 34.3, 45.6, 99.0                              | 34.0, 44.8, 98.3                              | 34.3, 45.5, 98.7                              |
| α, β, γ, °                                                     |                                               | α = β = γ = 90                                |                                               |                                               |
| Resolution, Å                                                  | 2.0                                           | 1.6                                           | 0.85                                          | 1.05                                          |
| Unique reflections                                             | 8,745                                         | 20,795                                        | 130,200                                       | 71,782                                        |
| Redundancy                                                     | 7.5 (5.8)                                     | 4.1 (4.0)                                     | 5.5 (4.0)                                     | 9.9 (9.1)                                     |
| Completeness, %                                                | 79.3 (61.3)*                                  | 97.7 (94.0)*                                  | 98.2 (97.2)                                   | 98.3 (97.2)                                   |
| R <sub>sym</sub> <sup>†</sup>                                  | 0.188 (0.305)*                                | 0.097 (0.446)*                                | 0.049 (0.550)                                 | 0.045 (0.458)                                 |
| I/σ(I)                                                         | 5.3 (3.2)*                                    | 13.7 (2.97)*                                  | 36.3 (2.3)                                    | 40.8 (5.2)                                    |
| <b>Refinement</b>                                              |                                               |                                               |                                               |                                               |
| R <sub>work</sub> <sup>‡</sup> /R <sub>free</sub> <sup>§</sup> | 0.2310/0.2714                                 | 0.1937/0.2178                                 | 0.128/0.112                                   | 0.134/0.108                                   |
| No. of atoms                                                   |                                               |                                               |                                               |                                               |
| Protein                                                        | 2,799                                         |                                               | 1,779                                         | 1,716                                         |
| NADP <sup>+</sup>                                              | 80                                            |                                               | 48                                            | 48                                            |
| Folate                                                         | 54                                            |                                               | 32                                            | 32                                            |
| Mn <sup>2+</sup>                                               | 2                                             |                                               | 2                                             | 2                                             |
| Water                                                          | 357                                           |                                               | 356                                           | 230                                           |
| B factors                                                      |                                               |                                               |                                               |                                               |
| Protein                                                        | 18.1                                          |                                               | 9.3                                           | 14.6                                          |
| NADP <sup>+</sup>                                              | 12.2                                          |                                               | 8.0                                           | 10.6                                          |
| Folate                                                         | 17.6                                          |                                               | 11.7                                          | 18.4                                          |
| Mn <sup>2+</sup>                                               | 37.1                                          |                                               | 7.5                                           | 13.0                                          |
| Water                                                          | 34.5                                          |                                               | 25.9                                          | 38.6                                          |
| Deviation from ideality                                        |                                               |                                               |                                               |                                               |
| Bond length, Å                                                 | 0.005                                         |                                               | 0.014                                         | 0.012                                         |
| Bond angle, °                                                  | 1.04                                          |                                               | 2.2                                           | 2.1                                           |
| Ramachandran plot statistics, %                                |                                               |                                               |                                               |                                               |
| Most favorable                                                 | 99.36                                         |                                               | 98.6                                          | 99.5                                          |
| Allowed                                                        | 0.64                                          |                                               | 1.4                                           | 0.5                                           |
| Disallowed                                                     | 0                                             |                                               | 0                                             | 0                                             |
| PDB ID code                                                    | 4PDJ                                          |                                               | 4PSY                                          | 4RGC                                          |

\*Numbers in parentheses represent values in the highest-resolution shell.

<sup>†</sup>R<sub>sym</sub> =  $\sum(|I_i - \langle I \rangle|) / \sum(I)$ , where  $I_i$  is the measured intensity and  $\langle I \rangle$  is the mean intensity of all measured observations equivalent to reflection  $I_i$ .

<sup>‡</sup>R<sub>work</sub> =  $\sum(|F_{obs}| - |F_{calc}|) / \sum|F_{obs}|$ , where  $|F_{obs}|$  is the observed diffraction amplitude and  $|F_{calc}|$  is the corresponding calculated structure factor amplitude.

<sup>§</sup>R<sub>free</sub> is defined by R<sub>work</sub>, involving 5% of the measured reflections not used in refinement and set aside for cross-validation purposes.



Table S2. Cont.

| Residue | Occupancy | H/D exchange | Secondary structure |
|---------|-----------|--------------|---------------------|
| 63      | 0.28      | D*           | B                   |
| 64      | 0.64      | D**          | L                   |
| 65      | 0.77      | D**          | L                   |
| 66      | N/A       | P            | L                   |
| 67      | 0.64      | D**          | L                   |
| 68      | 1.00      | D**          | L                   |
| 69      | 0.70      | D**          | L                   |
| 70      | 0.20      | D*           | L                   |
| 71      | 0.33      | D*           | L                   |
| 72      | 0         | H            | L                   |
| 73      | 0.31      | D*           | B                   |
| 74      | 0.74      | D*           | B                   |
| 75      | 0         | H            | B                   |
| 76      | 1.00      | D**          | L                   |
| 77      | 0.87      | D**          | L                   |
| 78      | 1.00      | D**          | H                   |
| 79      | 0.92      | D**          | H                   |
| 80      | 1.00      | D**          | H                   |
| 81      | 0         | H            | H                   |
| 82      | 0.11      | H            | H                   |
| 83      | 0.50      | D*           | H                   |
| 84      | 0         | H            | H                   |
| 85      | 0         | H            | H                   |
| 86      | 0.87      | D**          | L                   |
| 87      | 0.73      | D**          | L                   |
| 88      | 1.00      | D**          | L                   |
| 89      | N/A       | P            | L                   |
| 90      | 1.00      | D**          | L                   |
| 91      | 0.23      | D*           | B                   |
| 92      | 0         | H            | B                   |
| 93      | 0         | H            | B                   |
| 94      | 0         | H            | L                   |
| 95      | 0.37      | D*           | L                   |
| 96      | 0.95      | D**          | L                   |
| 97      | 0.91      | D**          | H                   |
| 98      | 0.90      | D**          | H                   |
| 99      | 0.79      | D**          | H                   |
| 100     | 0.17      | D*           | H                   |
| 101     | 1.00      | D**          | H                   |
| 102     | 0.79      | D**          | H                   |
| 103     | 0.25      | D*           | H                   |
| 104     | 0.07      | H            | L                   |
| 105     | N/A       | P            | L                   |
| 106     | 0.96      | D**          | L                   |
| 107     | 0         | H            | L                   |
| 108     | 1.00      | D**          | L                   |
| 109     | 0.03      | H            | B                   |
| 110     | 0         | H            | B                   |
| 111     | 0.01      | H            | B                   |
| 112     | 0         | H            | B                   |
| 113     | 0         | H            | B                   |
| 114     | 0.16      | D*           | B                   |
| 115     | 0.08      | H            | B                   |
| 116     | 0.74      | D**          | L                   |
| 117     | 1.00      | D**          | L                   |
| 118     | 0.87      | D**          | L                   |
| 119     | 0.76      | D**          | L                   |
| 120     | 0.80      | D**          | L                   |
| 121     | 0.86      | D**          | L                   |
| 122     | 0.83      | D**          | L                   |
| 123     | 0.79      | D**          | B                   |
| 124     | 0.42      | D*           | B                   |
